# Supplementary material for: A fluorene–carbazole conjugated polymer hole conductor for efficient and stable perovskite solar cells
Source: Royal Society of Chemistry journal article supplement (doi:10.1039/d4ta02009j), 2024-01-01
Supplement: d4ta02009j1.pdf [file d4ta02009j1.pdf]

Electronic Supplementary Material

**A Fluorene-Carbazole Conjugated Polymer Hole Conductor for Efficient and Stable  
Perovskite Solar Cells**

Bei Wang<sup>a</sup>, Junjun Guo<sup>a</sup>, Xuanang Luo<sup>b</sup>, Chenxu Han<sup>a</sup>, Bo Zhao<sup>a</sup>, Ihsan Ullah<sup>a</sup>, Yuxin Kong<sup>a</sup>,  
Xinyu Zhao<sup>a</sup>, Lei Ying<sup>b,\*</sup>, Jianyu Yuan<sup>a,\*</sup>

*<sup>a</sup>Jiangsu Key Laboratory for Carbon-Based Functional Materials & Devices, Institute of  
Functional Nano & Soft Materials (FUNSOM), Soochow University, 199 Ren'ai Road, Suzhou,  
215123 Jiangsu, P. R. China*

*<sup>b</sup>Institute of Polymer Optoelectronic Materials and Devices, State Key Laboratory of  
Luminescent Materials and Devices, South China University of Technology, 381 Wushan Road,  
Guangzhou, 510640 Guangdong, P.R. China.*

\*Corresponding author: [msleiying@scut.edu.cn](mailto:msleiying@scut.edu.cn) (L. Y.); [jyyuan@suda.edu.cn](mailto:jyyuan@suda.edu.cn) (J. Y.)

## Materials:

PF8Cz was prepared and purchased from VOLT-AMP optoelectronics Tech. Co., Ltd, lead bromide ( $\text{PbBr}_2$ , 99.99%) and lead iodide ( $\text{PbI}_2$ , 99.999%) from Sigma-Aldrich, cesium iodide ( $\text{CsI}$ , 99.99%) was from Alfa Aesar and formamidinium iodide (FAI, 99.9%) and methylammonium bromide (MABr, 99.99%) from Great solar, 2,2',7,7'-tetrakis[N,N-di(4-methoxyphenyl)amino]-9,9'-spirobifluorene (Spiro-OMeTAD), poly[bis(4-phenyl)(2,4,6-trimethyl-phenyl)amine] (PTAA) and tris(pentafluorophenyl)borane (LAD) from Xi'an Polymer Light Technology Corp. Solvents used for perovskite solar cell include anhydrous N,N-dimethylformamide (DMF) and dimethyl sulfoxide (DMSO), chlorobenzene were from Alfa Aesar. All the materials were used directly without further purification. Glass/F-doped tin oxide (FTO) was purchased from Advanced Election Technology Co., Ltd.

## Characterizations and measurements

The current density-voltage ( $J-V$ ) characteristics of the solar cells were measured using a Keithley 2400 Digital Source Meter and simulated AM 1.5G spectrum at  $100 \text{ mW/cm}^2$  with a solar simulator (Class AAA, 94023A-U, Newport) in the ambient atmosphere. Before testing, the light intensity of the xenon lamp was calibrated with a standard silicon solar cell (91150 V, Newport Oriel). The external quantum efficiency (EQE) measurement of the solar cells was characterized on a Solar Cell Scan 100 system (Zolix Instruments Co. Ltd.). UV-Vis spectra were recorded on a PerkinElmer model Lambda 750. Steady-state PL data and time-resolved PL spectra were obtained by testing with a FluoroMax-4 spectrofluorometer (HORIBA Scientific) with a 150 W ozone-free xenon lamp laser and an excitation wavelength of 490 nm. Cross-section SEM images were obtained by a Zeiss 500 field in high vacuum mode at 15 kV accelerating voltage. The FTO/ $\text{TiO}_2$ /perovskite/HTMs/ $\text{MoO}_3$  structure was adopted to perform EIS measurements carried out through a Zahner IM6 electrochemical workstation while applying a bias under open-circuit conditions with a frequency between 1 MHz and 100 Hz

under monochromatic LED (500 nm, 100 mW cm<sup>-2</sup>) light irradiation. Cyclic voltammetry (CV) curves of polymers were obtained using a CHI630E electrochemical workstation with a three-electrode system. The working electrode was a glassy carbon electrode, the reference electrode was a saturated calomel electrode (SCE), and the counter electrode was a platinum wire. The electrolyte solution was 0.1 M tetrabutylammonium hexafluorophosphate (TBAPF<sub>6</sub>) in anhydrous acetonitrile. The experiments were conducted under a nitrogen atmosphere at a scan rate of 200 mV s<sup>-1</sup>. The energy levels of the highest occupied molecular orbital ( $E_{HOMO}$ ) of the polymers were calculated from the onset oxidation and reduction potentials, respectively, using the following equation:  $E_{HOMO} = - [e(E_{ox} - E_{Fc/Fc^+} + 5.1)]$  (eV), where  $e$  is the elementary charge,  $E_{ox}$  are the onset oxidation potential versus the calomel electrode, and  $E_{Fc/Fc^+}$  is the ferrocene/ferrocenium redox potential versus SCE, which was measured as 0.42 V. Grazing incidence wide-angle X-ray scattering (GIWAXS) was performed using MetalJet-D2, Excillum (Xenocs, France). The X-ray wavelength is 0.134144 nm. The sample-to-detector distance was 214.545 mm, and the incidence angle of the X-ray beam to the film surface was set at 0.20°. Scattering images were recorded using a 2D detector (Pilatus3R 1M, Dectris). The resulting GIWAXS data was analyzed using a custom Python-based code.

#### *TRPL fitting:*

The TRPL test results were fitted by a biexponential function as follows:

$$f(t) = A_1 e^{-\frac{t}{\tau_1}} + A_2 e^{-\frac{t}{\tau_2}} + A_0$$

where  $A_0$  is a constant,  $t$  is the time,  $A_1$  and  $A_2$  are the decay amplitudes,  $\tau_1$  and  $\tau_2$  are the decay times, and the average PL lifetime ( $\tau_{ave}$ ) can be obtained by the following equation:

$$\tau_{ave} = \frac{A_1 \tau_1^2 + A_2 \tau_2^2}{A_1 \tau_1 + A_2 \tau_2}$$

#### *SCLC measurements:*

SCLC measurements are often followed by three regimes: (i) the ohmic region ( $I \propto V$ ) to calculate the electrical conductivity, (ii) the TFL region ( $I \propto V^n$ ,  $n > 2$ ) to estimate the trap density, and (iii) Child's region ( $I \propto V^2$ ) to determine the charge mobility. The  $J$ - $V$  characteristics of the hole-only devices are fitted using the Mott-Gurney law, expressed as:

$$J = \frac{9}{8} \varepsilon \varepsilon_0 \mu \frac{V^2}{L^3}$$

where  $\varepsilon$  is the dielectric constant of the active layer,  $\mu$  is the mobility,  $\varepsilon_0$  is the permittivity of free space, and  $L$  is the thickness of the active layer. All measurements were performed in the dark, and the voltage was scanned from -5 to 5 V.

Furthermore, the conductivity ( $\sigma$ ) was extracted from the slope of the current-voltage ( $I$ - $V$ ) curve:

$$I = \frac{\sigma AV}{d}$$

where  $A$  is the area of the sample and  $d$  is the thickness of the HTMs.

*Trap density:*

A pure hole device of FTO/PEDOT:PSS/Perovskite/HTMs/MoO<sub>3</sub>/Ag was used to characterize the trap density ( $n_{\text{trap}}$ ) in the device. The trap density characterization satisfies the following equation:

$$V_{TFL} \approx \frac{eL^2}{2\varepsilon_0\varepsilon_r} n_{\text{trap}}$$

where  $V_{TFL}$  is the trap-filled limit voltage and  $L$  is the thickness of the perovskite film.

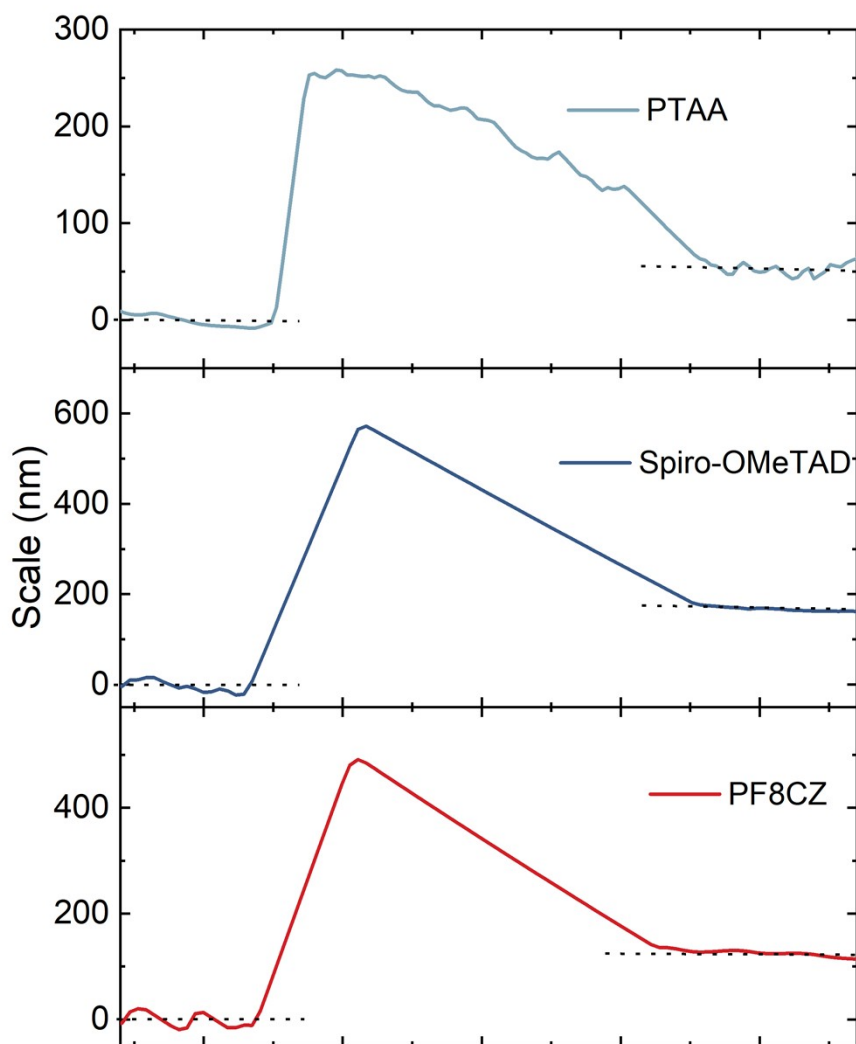

Fig. S1. AFM Step-height profiles for extracting thickness of HTM: ~50 nm (PTAA); ~160 nm (Spiro-OMeTAD); ~120 nm (PF8Cz).

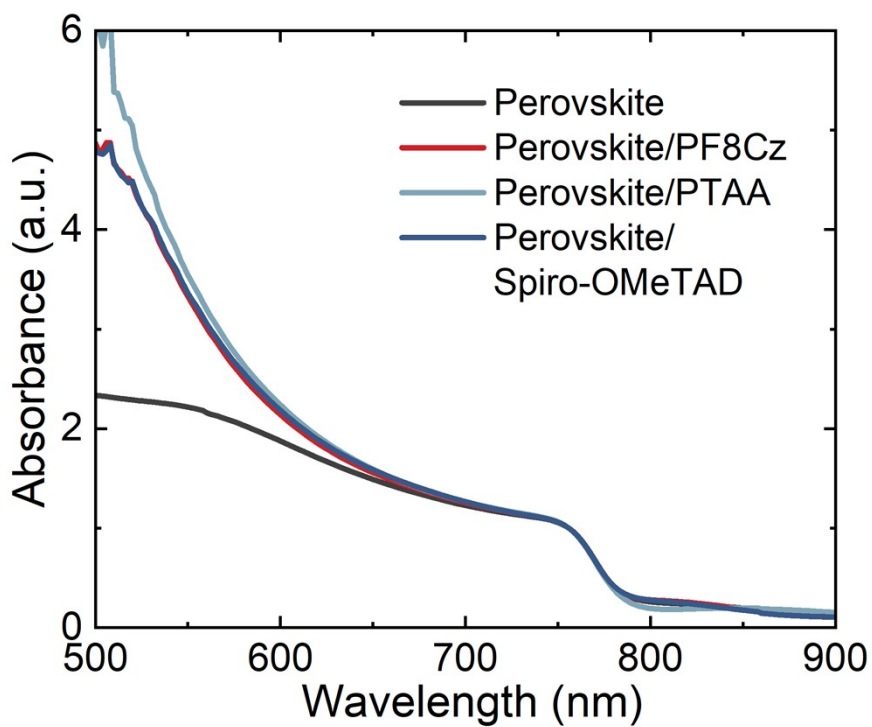

Fig. S2. UV-vis absorption spectra of perovskite and perovskite/different HTMs films.

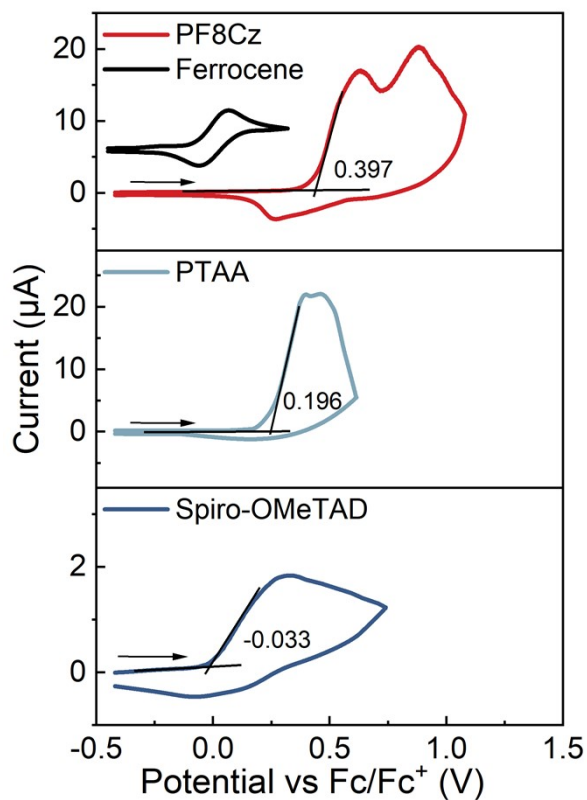

Fig. S3. Cyclic voltammetry curves of the oxidation of films.

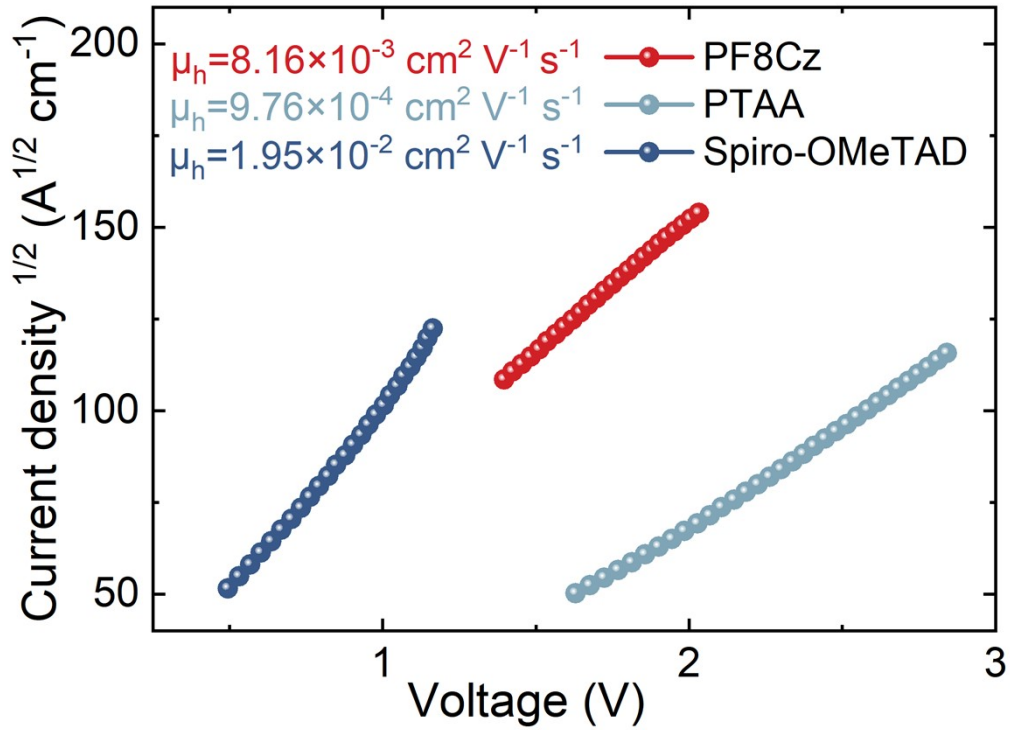

Fig. S4.  $J^{1/2}$ - $V$  characteristics of the different HTMs based on hole-only devices.

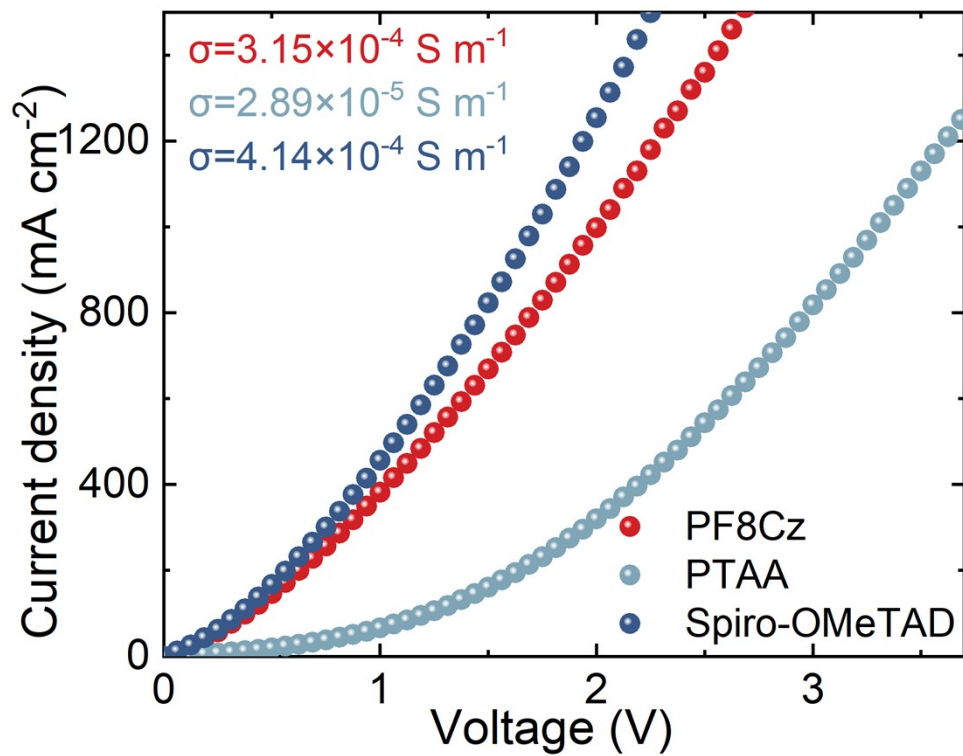

Fig. S5.  $J$ - $V$  characteristics of the different HTMs based on hole-only devices.

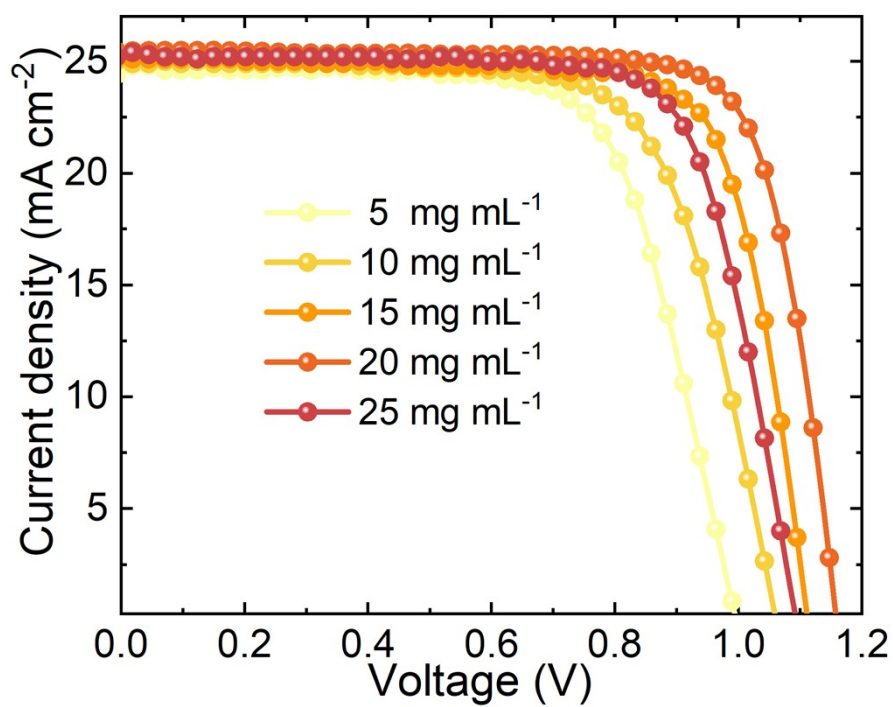

Fig. S6.  $J$ - $V$  curves based on different concentrations of PF8Cz-based PSCs.

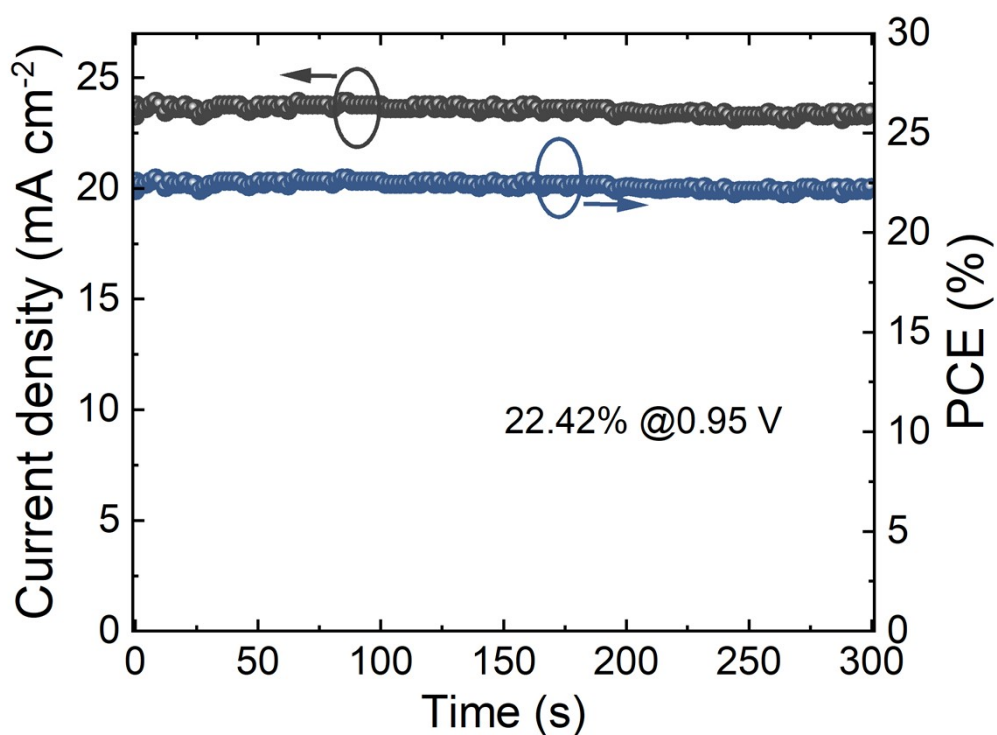

Fig. S7. The SPO of the Spiro-OMeTAD-based PSCs.



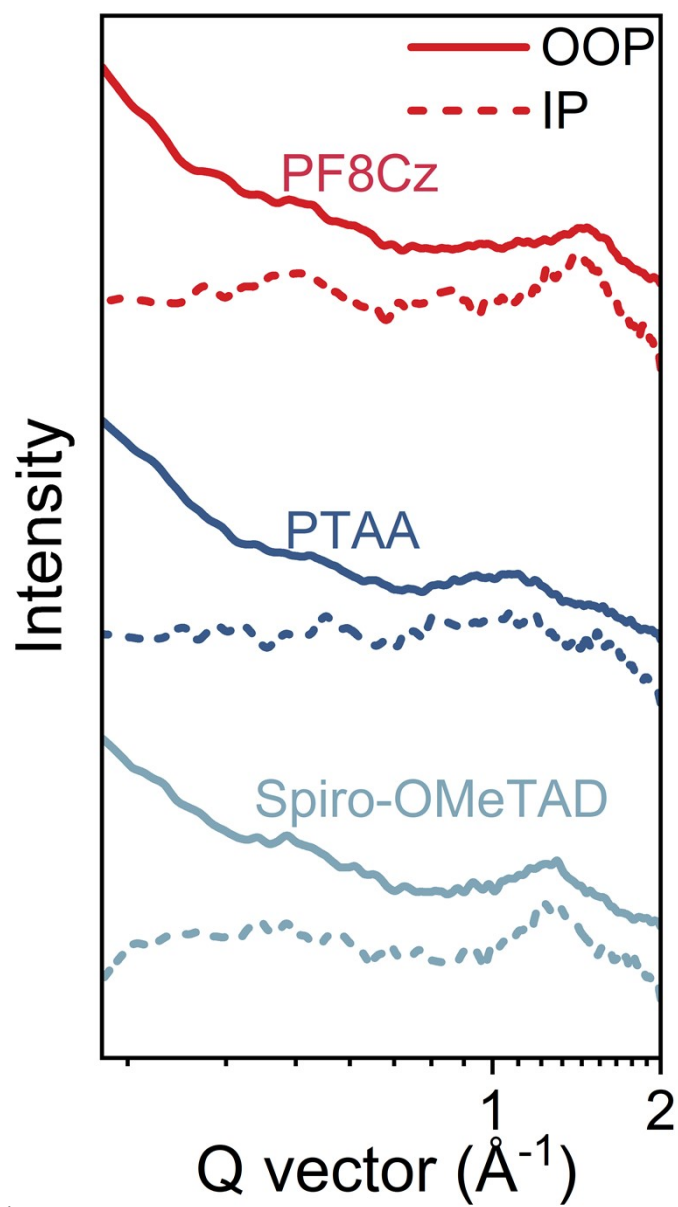

Fig. S8. Sector-averaged  $I$ - $q$  curves in the IP (dashed lines) and OOP (solid lines) directions.

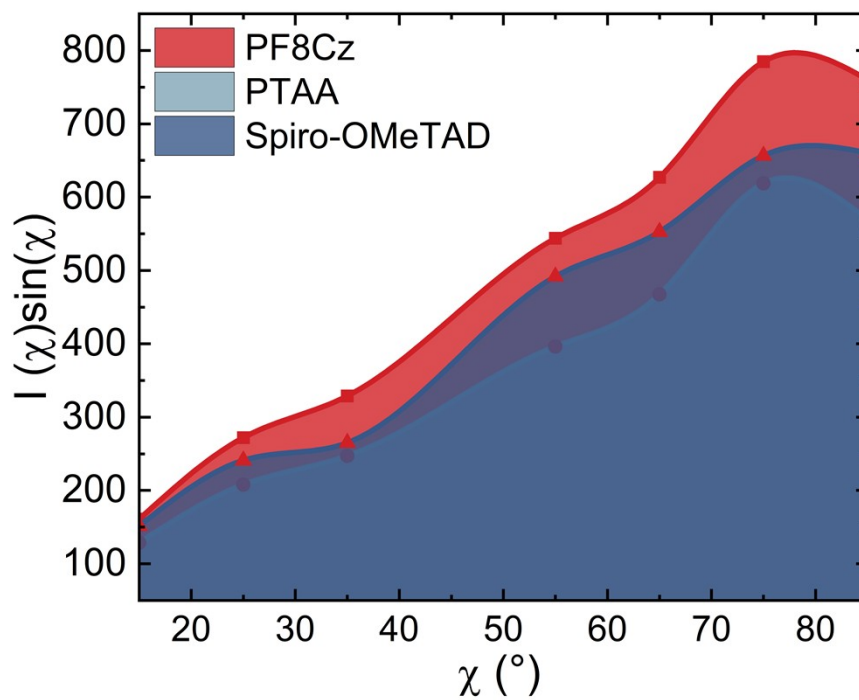

Fig. S9.  $Intensity \cdot \sin \chi$  as a function of  $\chi$  of PF8Cz, PTAA, and spiro-OMeTAD thin films.

Inset are the calculated rDoC values.

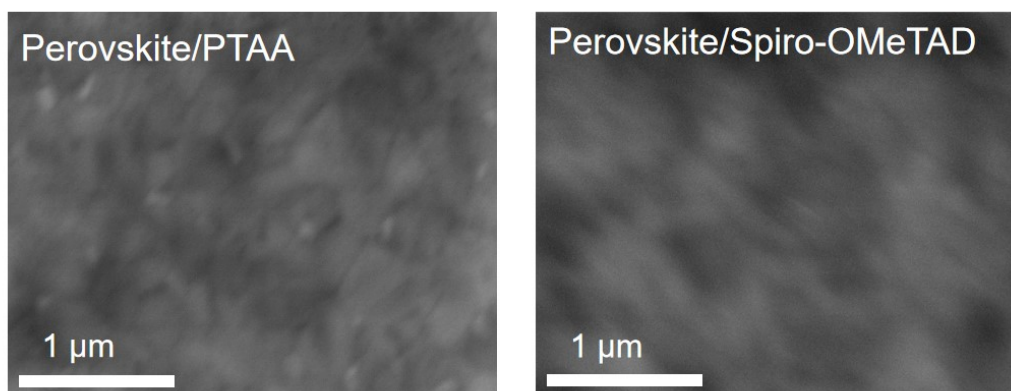

Fig. S10. Top-view SEM images of perovskite/PTAA and perovskite/Spiro-OMeTAD.

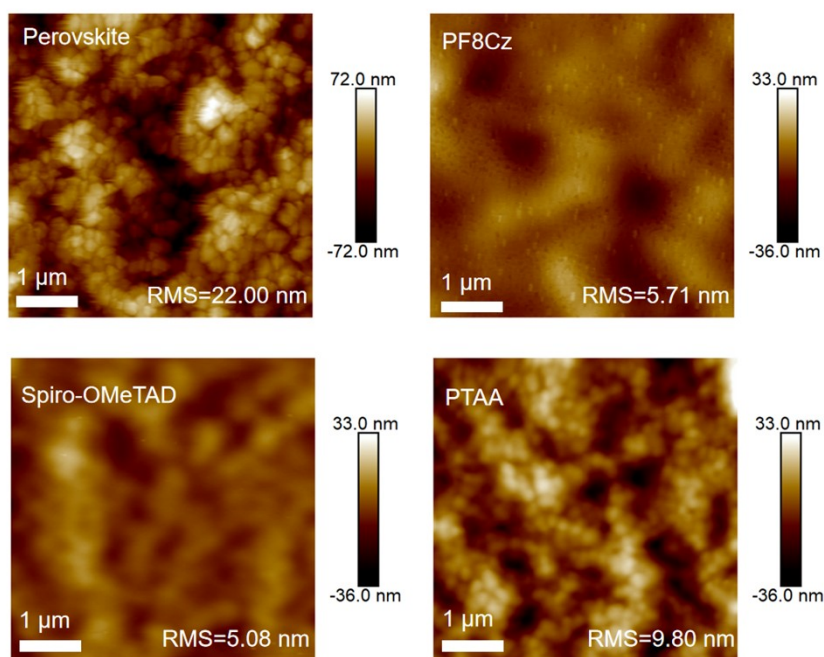

Fig. S11. AFM images of the perovskite and perovskite/different HTMs films.

Table S1. PV device parameters of different concentrations of PF8Cz-based PSCs.

| Condition              | $V_{OC}$ (V) | $J_{SC}$ (mA/cm <sup>2</sup> ) | $FF$ (%) | PCE (%) |
|------------------------|--------------|--------------------------------|----------|---------|
| 5 mg mL <sup>-1</sup>  | 0.998        | 24.45                          | 0.70     | 17.09   |
| 10 mg mL <sup>-1</sup> | 1.069        | 24.95                          | 0.70     | 18.55   |
| 15 mg mL <sup>-1</sup> | 1.121        | 25.09                          | 0.76     | 21.31   |
| 20 mg mL <sup>-1</sup> | 1.174        | 25.47                          | 0.78     | 23.05   |
| 25 mg mL <sup>-1</sup> | 1.095        | 25.18                          | 0.74     | 20.45   |

Table S2. Fitting parameters of the decay amplitude and decay time obtained from TRPL spectra.

| Condition               | $\tau_{average}$ (ns) | $\tau_1$ (ns) | $\tau_2$ (ns) | $A_1$  | $A_2$ |
|-------------------------|-----------------------|---------------|---------------|--------|-------|
| Perovskite              | 738.5                 | 11.3          | 1026.2        | 570.8  | 15.8  |
| Perovskite/Spiro-OMeTAD | 4.6                   | 0.9           | 7.5           | 2276.4 | 330.4 |
| Perovskite/PF8Cz        | 11.6                  | 0.8           | 15.1          | 1623.4 | 259.3 |

Perovskite/PTAA                      23.1                      4.5                      41.9                      929.8                      100.1

Table S3. Recently reported n-i-p PSCs based on conjugated polymer HTM with > 22% effici

| HTMs       | Device architectures                                                                                                     | PCE (%)       | References                                                  |
|------------|--------------------------------------------------------------------------------------------------------------------------|---------------|-------------------------------------------------------------|
| PT-Cz50    | ITO/SnO <sub>2</sub> /PVSK/HTM/MoO <sub>3</sub> /Ag                                                                      | 22.53%        | <i>Adv. Funct. Mater.</i> , 2023, <b>33</b> , 2308435       |
| PC-DPP     | TO/SnO <sub>2</sub> /perovskite/HTMs/MoO <sub>3</sub> /Ag                                                                | 22.67%.       | <i>ACS Energy Lett.</i> , 2023, <b>8</b> , 2878             |
| PFBTI      | glass/ITO/SnO <sub>2</sub> /Cs <sub>0.05</sub> FA <sub>0.95</sub> PbI <sub>3</sub> /HTM/MoO <sub>3</sub> /Ag             | 23.10%        | <i>Adv. Mater.</i> , 2022, <b>34</b> , 2110587              |
| PM6        | ITO/SnO <sub>2</sub> /perovskite/HTMs/MoO <sub>3</sub> /Ag                                                               | 24.04%,       | <i>Angew. Chem. Int. Ed.</i> , 2022, <b>61</b> , e202210356 |
| PE10       | lass/ITO/SnO <sub>2</sub> /perovskite (FA <sub>0.85</sub> MA <sub>0.15</sub> PbI <sub>3</sub> )/HTM/MoO <sub>3</sub> /Ag | 22.30%        | <i>Angew. Chem. Int. Ed.</i> , 2022, <b>61</b> , e202201847 |
| Nap-SiBTA  | FTO/compact-TiO <sub>2</sub> /mesoporous-TiO <sub>2</sub> /perovskite/NapSiBTA or Spiro-OMeTAD/Au                        | 23.07%        | <i>Adv. Energy Mater.</i> , 2023, <b>13</b> , 2202680       |
| PTTDZ-Cl   | FTO/SnO <sub>2</sub> /FAMA perovskite/HTM/MoO <sub>3</sub> /Ag.                                                          | 22.20%        | <i>Sol. Rrl</i> , 2023, 2300706                             |
| PNTDT-2F2T | ITO/SnO <sub>2</sub> /MAPbI <sub>3</sub> /HTM/Au.                                                                        | 22.19%        | <i>J. Mater. Chem.a</i> , 2022, <b>10</b> , 12187           |
| PBQ6       | ITO/SnO <sub>2</sub> /perovskite/polymer HTM/MoO <sub>3</sub> /Ag                                                        | 22.60%        | <i>Science China Chemistry</i> , 2021, <b>64</b> , 2035     |
| PC6        | glass/FTO/SnO <sub>2</sub> /perovskite (MAPbI <sub>3</sub> )/HTM/Au                                                      | 22.20%        | <i>Angew.Chem.Int.Ed.</i> , 2022, <b>61</b> , e202114341    |
| 2DP-TDB    | ITO/SnO <sub>2</sub> /FA <sub>0.85</sub> MA <sub>0.15</sub> PbI <sub>3</sub> /HTMs/MoO <sub>3</sub> /Ag                  | 22.17%        | <i>ACS Energy Lett.</i> , 2021, <b>6</b> , 1521             |
| PBTFO      | ITO/SnO <sub>2</sub> /perovskite/polymer HTM/Au                                                                          | 22.10%        | <i>Nano Energy</i> , 2020, <b>78</b> , 105159               |
| PBDB-Cz    | ITO/SnO <sub>2</sub> /perovskite/HTM/MoO <sub>3</sub> /Ag                                                                | 22.06%        | <i>Adv. Energy Mater.</i> , 2022, <b>12</b> , 2102697       |
| PMSe       | ITO/SnO <sub>2</sub> /perovskite/HTMs/MoO <sub>3</sub> /Ag                                                               | 24.53%        | <i>J. Am. Chem. Soc.</i> , 2022, <b>144</b> , 9500          |
| PFBCz      | ITO/TiO <sub>2</sub> /perovskite/HTM/MoO <sub>3</sub> /Ag                                                                | <b>23.28%</b> | <b>This work</b>                                            |
